# Supplementary material for: A Minimal PBPK/PD Model with Expansion-Enhanced Target-Mediated Drug Disposition to Support a First-in-Human Clinical Study Design for a FLT3L-Fc Molecule
Source: MDPI journal article supplement (doi:10.3390/pharmaceutics16050660), 2024-05-15

**Figure S1.** Projected time profiles of single-bound, double-bound and total receptor occupancy in healthy volunteers treated with a single dose of FLT3L-Fc.

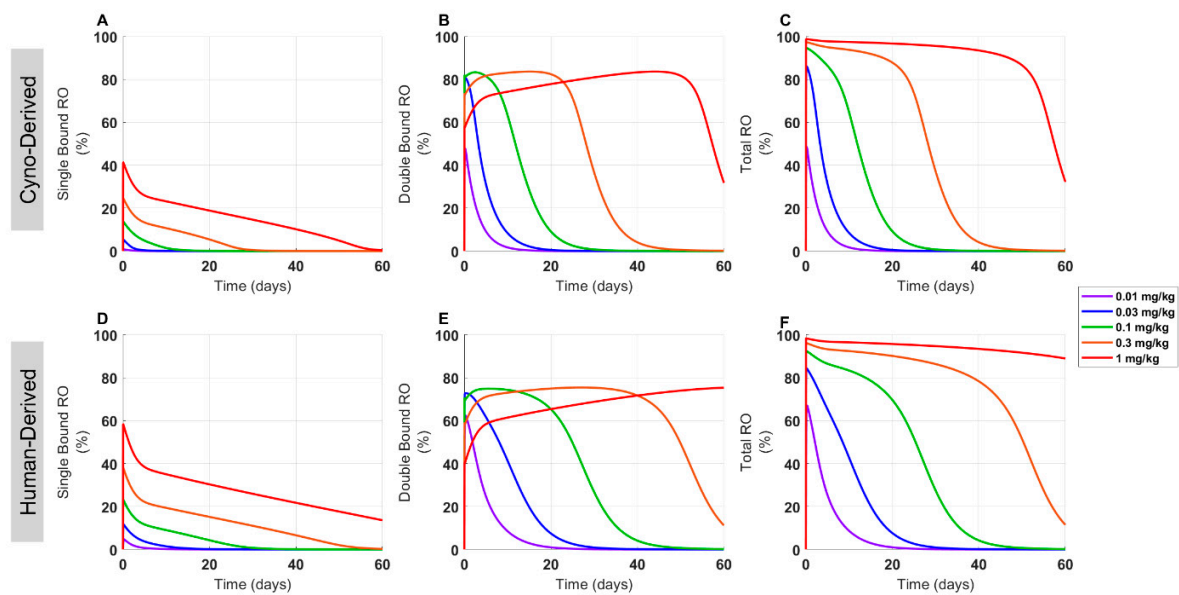

Supplement: s1 [file s1]
