# Supplementary material for: A Minimal PBPK/PD Model with Expansion-Enhanced Target-Mediated Drug Disposition to Support a First-in-Human Clinical Study Design for a FLT3L-Fc Molecule
Source: MDPI journal article supplement (doi:10.3390/pharmaceutics16050660), 2024-05-15
Supplement: s1 [file s1]

## ***Supplemental ODEs and Repeated Assignments***

### ***Supplemental ODEs:***

$$\begin{aligned} d(\text{AmtCentral\_ug})/dt = & -((\text{kon1\_1nMh} * \text{ConcCentral\_Fc\_nM} * \text{TargetCentral\_nM} - \\ & \text{kon1\_1nMh} * \text{KD1\_nM} * \text{Complex\_SB\_Central\_nM}) * \text{Vplasma\_L} * \text{MWab\_ugnmole}) - ((1 - \\ & \text{sig\_tight}) * \text{L\_tight\_Lh} * \text{ConcCentral\_ugL}) - ((1 - \\ & \text{sig\_leaky}) * \text{L\_leaky\_Lh} * \text{ConcCentral\_ugL}) + (\text{L\_Lh} * \text{AmtLymph\_ug} / \text{Vlymph\_L}) - \\ & (\text{CLp\_Lh} * \text{ConcCentral\_ugL}) + ((\text{kabs\_CDX\_1h} * \text{SCdepot\_CDX\_ug}) * \text{min\_PBPK}) + \\ & (\text{infusion\_Fc\_ug} / \text{inf\_time\_h}) \end{aligned}$$

$$\begin{aligned} d(\text{AmtTight\_ug})/dt = & ((1 - \text{sig\_tight}) * \text{L\_tight\_Lh} * \text{ConcCentral\_ugL}) - ((1 - \\ & \text{sig\_lymph}) * \text{L\_tight\_Lh} * \text{ConcTight\_ugL}) - \\ & ((\text{kon1\_1nMh} * \text{ConcTight\_nM} * \text{TargetTight\_nM} - \\ & \text{kon1\_1nMh} * \text{KD1\_nM} * \text{ComplexTight\_nM}) * \text{Vtight\_L} * \text{MWab\_ugnmole}) \end{aligned}$$

$$\begin{aligned} d(\text{AmtLeaky\_ug})/dt = & ((1 - \text{sig\_leaky}) * \text{L\_leaky\_Lh} * \text{ConcCentral\_ugL}) - ((1 - \\ & \text{sig\_lymph}) * \text{L\_leaky\_Lh} * \text{ConcLeaky\_ugL}) - \\ & ((\text{kon1\_1nMh} * \text{ConcLeaky\_nM} * \text{TargetLeaky\_nM} - \\ & \text{kon1\_1nMh} * \text{KD1\_nM} * \text{ComplexLeaky\_nM}) * \text{Vleaky\_L} * \text{MWab\_ugnmole}) \end{aligned}$$

$$\begin{aligned} d(\text{AmtLymph\_ug})/dt = & ((1 - \text{sig\_lymph}) * \text{L\_tight\_Lh} * \text{ConcTight\_ugL}) + ((1 - \\ & \text{sig\_lymph}) * \text{L\_leaky\_Lh} * \text{ConcLeaky\_ugL}) - (\text{L\_Lh} * \text{AmtLymph\_ug} / \text{Vlymph\_L}) \end{aligned}$$

$$\begin{aligned} d(\text{TargetCentral\_nM})/dt = & 1/\text{min\_PBPK} * (((\text{ksyn\_central\_nMh}) * \text{min\_PBPK}) - \\ & ((\text{kdeg\_central\_1h} * \text{TargetCentral\_nM}) * \text{min\_PBPK}) - \\ & ((\text{kon1\_1nMh} * \text{ConcCentral\_Fc\_nM} * \text{TargetCentral\_nM} - \\ & \text{kon1\_1nMh} * \text{KD1\_nM} * \text{Complex\_SB\_Central\_nM}) * \text{min\_PBPK}) - \\ & ((\text{kon2\_1nMh} * \text{Complex\_SB\_Central\_nM} * \text{TargetCentral\_nM} - \\ & \text{kon2\_1nMh} * \text{KD2\_nM} * \text{Complex\_DB\_Central\_nM}) * \text{min\_PBPK}) + \\ & (0 * \text{Target\_Tot\_nM} * \text{vm\_prolif} * ((\text{RO\_SB}/100)^{\alpha}) / ((\text{RO\_SB}/100)^{\alpha} + \text{km\_prolif}^{\alpha} \\ & \text{lpha})) + \\ & (\text{Target\_Tot\_nM} * \text{vm\_prolif} * ((\text{RO\_DB}/100)^{\alpha}) / ((\text{RO\_DB}/100)^{\alpha} + \text{km\_prolif}^{\alpha} \\ & \text{ha}))) \end{aligned}$$

$$\begin{aligned} d(\text{TargetLeaky\_nM})/dt = & 1/\text{min\_PBPK} * (((\text{ksyn\_leaky\_nMh}) * \text{min\_PBPK}) - \\ & ((\text{kdeg\_leaky\_1h} * \text{TargetLeaky\_nM}) * \text{min\_PBPK}) - \\ & ((\text{kon1\_1nMh} * \text{ConcLeaky\_nM} * \text{TargetLeaky\_nM} - \\ & \text{kon1\_1nMh} * \text{KD1\_nM} * \text{ComplexLeaky\_nM}) * \text{min\_PBPK})) \end{aligned}$$

$$\begin{aligned} d(\text{TargetTight\_nM})/dt = & 1/\text{min\_PBPK} * (((\text{ksyn\_tight\_nMh}) * \text{min\_PBPK}) - \\ & ((\text{kdeg\_tight\_1h} * \text{TargetTight\_nM}) * \text{min\_PBPK}) - \\ & ((\text{kon1\_1nMh} * \text{ConcTight\_nM} * \text{TargetTight\_nM} - \\ & \text{kon1\_1nMh} * \text{KD1\_nM} * \text{ComplexTight\_nM}) * \text{min\_PBPK})) \end{aligned}$$

$$\begin{aligned} d(\text{Complex\_SB\_Central\_nM})/dt = & \\ & 1/\text{min\_PBPK} * (((\text{kon1\_1nMh} * \text{ConcCentral\_Fc\_nM} * \text{TargetCentral\_nM} - \\ & \text{kon1\_1nMh} * \text{KD1\_nM} * \text{Complex\_SB\_Central\_nM}) * \text{min\_PBPK}) - \\ & ((\text{kint\_1h} * \text{Complex\_SB\_Central\_nM}) * \text{min\_PBPK}) - \\ & ((\text{kon2\_1nMh} * \text{Complex\_SB\_Central\_nM} * \text{TargetCentral\_nM} - \\ & \text{kon2\_1nMh} * \text{KD2\_nM} * \text{Complex\_DB\_Central\_nM}) * \text{min\_PBPK})) \end{aligned}$$

$$\begin{aligned}
d(\text{ComplexLeaky\_nM})/dt &= 1/\text{min\_PBPk} * (((\text{kon1\_1nMh} * \text{ConcLeaky\_nM} * \text{TargetLeaky\_nM} - \\
&\quad \text{kon1\_1nMh} * \text{KD1\_nM} * \text{ComplexLeaky\_nM}) * \text{min\_PBPk}) - \\
&\quad ((\text{kint\_1h} * \text{ComplexLeaky\_nM}) * \text{min\_PBPk})) \\
d(\text{ComplexTight\_nM})/dt &= 1/\text{min\_PBPk} * (((\text{kon1\_1nMh} * \text{ConcTight\_nM} * \text{TargetTight\_nM} - \\
&\quad \text{kon1\_1nMh} * \text{KD1\_nM} * \text{ComplexTight\_nM}) * \text{min\_PBPk}) - \\
&\quad ((\text{kint\_1h} * \text{ComplexTight\_nM}) * \text{min\_PBPk})) \\
d(\text{Complex\_DB\_Central\_nM})/dt &= \\
&\quad 1/\text{min\_PBPk} * (((\text{kon2\_1nMh} * \text{Complex\_SB\_Central\_nM} * \text{TargetCentral\_nM} - \\
&\quad \text{kon2\_1nMh} * \text{KD2\_nM} * \text{Complex\_DB\_Central\_nM}) * \text{min\_PBPk}) - \\
&\quad ((\text{kint\_1h} * \text{Complex\_DB\_Central\_nM}) * \text{min\_PBPk})) \\
d(\text{AUC\_Flt3Fc\_nMh})/dt &= 1/\text{min\_PBPk} * ((\text{ConcCentral\_Fc\_nM})) \\
d(\text{AUC\_CDX\_nMh})/dt &= 1/\text{min\_PBPk} * ((\text{CenConc\_CDX\_nM})) \\
d(\text{PD\_DC1})/dt &= 1/\text{min\_PBPk} * ((\text{kdeg\_DC1\_1h} * \text{init\_DC1}) - \\
&\quad ((\text{kdeg\_DC1\_1h} * \text{PD\_DC1} + \text{f\_DC1} * \text{kdeg2\_DC\_1h} * \text{max}(\text{PD\_DC1} - \\
&\quad \text{init\_DC1}, 0)^2 / \text{init\_DC1})) + \\
&\quad ((\text{PD\_DC1} * \text{kdeg\_DC1\_1h} * \text{vm1\_DC1} * \text{real}(\text{max}(0, \text{C3\_DC1})^{\text{n1\_DC1}}) / (\text{real}(\text{max}(0, \text{km1\_DC1})^{\text{n1\_DC1}}) + \text{real}(\text{max}(0, \text{C3\_DC1})^{\text{n1\_DC1}})))))) \\
d(\text{C1\_DC1})/dt &= 1/\text{min\_PBPk} * ((\text{del\_DC1} * (\text{C\_CDX\_FC} - \text{C1\_DC1}))) \\
d(\text{C2\_DC1})/dt &= 1/\text{min\_PBPk} * ((\text{del\_DC1} * (\text{C1\_DC1} - \text{C2\_DC1}))) \\
d(\text{CenAmt\_CDX\_ugkg})/dt &= 1/\text{min\_PBPk} * (-(\text{CL\_CDX\_mLhkg} * \text{CenConc\_CDX\_ugmL}) - \\
&\quad (\text{Vm\_CDX\_ughkg} * \text{CenConc\_CDX\_ugmL} / (\text{Km\_CDX\_ugmL} + \text{CenConc\_CDX\_ugmL})) \\
&\quad + ((\text{kabs\_CDX\_1h} * \text{SCdepot\_CDX\_ugkg}) * \text{min\_PBPk})) \\
d(\text{SCdepot\_CDX\_ugkg})/dt &= 1/\text{min\_PBPk} * (- \\
&\quad ((\text{kabs\_CDX\_1h} * \text{SCdepot\_CDX\_ugkg}) * \text{min\_PBPk})) \\
d(\text{SCdepot\_CDX\_ug})/dt &= 1/\text{min\_PBPk} * (-(\text{kabs\_CDX\_1h} * \text{SCdepot\_CDX\_ug}) * \text{min\_PBPk})) \\
d(\text{C2\_DC2})/dt &= 1/\text{min\_PBPk} * ((\text{del\_DC2} * (\text{C1\_DC2} - \text{C2\_DC2}))) \\
d(\text{C1\_DC2})/dt &= 1/\text{min\_PBPk} * ((\text{del\_DC2} * (\text{C\_CDX\_FC} - \text{C1\_DC2}))) \\
d(\text{PD\_DC2})/dt &= \\
&\quad 1/\text{min\_PBPk} * (((\text{PD\_DC2} * \text{kdeg\_DC2\_1h} * \text{vm1\_DC2} * \text{real}(\text{max}(0, \text{C3\_DC2})^{\text{n1\_DC2}}) / (\text{real}(\text{max}(0, \text{km1\_DC2})^{\text{n1\_DC2}}) + \text{real}(\text{max}(0, \text{C3\_DC2})^{\text{n1\_DC2}})))) - \\
&\quad ((\text{kdeg\_DC2\_1h} * \text{PD\_DC2} + \text{kdeg2\_DC\_1h} * \text{max}(\text{PD\_DC2} - \text{init\_DC2}, 0)^2 / \text{init\_DC2})) + \\
&\quad (\text{kdeg\_DC2\_1h} * \text{init\_DC2})) \\
d(\text{AUC\_Flt3Fc\_ugmLh})/dt &= 1/\text{min\_PBPk} * ((\text{ConcCentral\_ugmL})) \\
d(\text{infusion\_Fc\_ug})/dt &= 1/\text{min\_PBPk} * (-(\text{infusion\_Fc\_ug} / \text{inf\_time\_h})) \\
d(\text{AUC\_CDX\_ugmL})/dt &= 1/\text{min\_PBPk} * ((\text{CenConc\_CDX\_ugmL})) \\
d(\text{AUC\_RO})/dt &= 1/\text{min\_PBPk} * ((\text{RO}))
\end{aligned}$$

***Repeated Assignments:***

PD\_DC2\_foldexpansion = PD\_DC2/init\_DC2

PD\_DC1\_foldexpansion = PD\_DC1/init\_DC1

PD\_DCtotal = PD\_DC1 + PD\_DC2

PD\_DCtotal\_foldexpansion = PD\_DCtotal/( init\_DC1+ init\_DC2)

PD\_DC2\_norm = PD\_DC2/init\_DC2

C3\_DC2 = max(C2\_DC2,1e-6)

min\_PBPK.ConcCentral\_ngmL = AmtCentral\_ug/Vplasma\_L

CenConc\_CD\_X\_ugmL = CenAmt\_CD\_X\_ugkg/V1\_CD\_X\_mLkg

CenConc\_CD\_X\_ngmL = CenAmt\_CD\_X\_ugkg\*1000/V1\_CD\_X\_mLkg

PD\_DC1\_norm = PD\_DC1/init\_DC1

C3\_DC1 = max(C2\_DC1,1e-6)

CenConc\_CD\_X\_nM = min\_PBPK.CenConc\_CD\_X\_ngmL\*1000/MWCD\_X\_ugnmole

kint\_1h = kdeg\_central\_1h

ConcCentral\_ugmL = AmtCentral\_ug/Vplasma\_L/1000

Target\_Tot\_nM = TargetCentral\_nM+Complex\_SB\_Central\_nM+2\*Complex\_DB\_Central\_nM

RO\_SB = Complex\_SB\_Central\_nM/max(Target\_Tot\_nM,1e-18)\*100

RO\_DB = 2\*Complex\_DB\_Central\_nM/max(Target\_Tot\_nM,1e-18)\*100

RO = (1-TargetCentral\_nM/max(Target\_Tot\_nM,1e-18))\*100

ConcLeaky\_ugL = AmtLeaky\_ug/Vleaky\_L

ConcLeaky\_nM = ConcLeaky\_ugL\*(1/MWab\_ugnmole)

ConcTight\_ugL = AmtTight\_ug/Vtight\_L

ConcTight\_nM = ConcTight\_ugL\*(1/MWab\_ugnmole)

ConcCentral\_ugL = AmtCentral\_ug/Vplasma\_L

ConcCentral\_Fc\_nM = ConcCentral\_ugL\*(1/MWab\_ugnmole)

C\_CD\_X\_FC = (FC\_flag==0)\*CenConc\_CD\_X\_nM+(FC\_flag==1)\*ConcCentral\_Fc\_nM
