# Supplementary material for: A Minimal PBPK/PD Model with Expansion-Enhanced Target-Mediated Drug Disposition to Support a First-in-Human Clinical Study Design for a FLT3L-Fc Molecule
Source: MDPI journal article supplement (doi:10.3390/pharmaceutics16050660), 2024-05-15
Supplement: s1 [file s1]

Table S2: Model parameters

| Parameter (unit)           | Definition                                                                            | Cyno Value | Human Value | Source                                          |
|----------------------------|---------------------------------------------------------------------------------------|------------|-------------|-------------------------------------------------|
| $MW_{FC}$ (Da)             | Molecular weight of FLT3L-Fc                                                          | 83000      | 83000       | In-house measurement                            |
| $MW_{CDX}$ (Da)            | Molecular weight of CDX-301                                                           | 35000      | 35000       | Ref. (1)                                        |
| BW (kg)                    | Body weight                                                                           | 2.6        | 70          | Nominal body weight value for species           |
| $V_{lymph}$ (L)            | Volume of lymph                                                                       | 0.086      | 5.2         | Cyno fit from data, human from (2)              |
| $V_{plasma}$ (L)           | Volume of plasma                                                                      | 0.09       | 2.6         | Cyno fit from data, human from (2)              |
| $CL_p$ (L/h)               | Nonspecific clearance of FLT3L-Fc                                                     | 4.2E-04    | 6.94E-03    | Cyno fit from data, human allometrically scaled |
| $CL_p$ (mL/d/kg)           | Nonspecific clearance of FLT3L-Fc                                                     | 3.87       | 2.4         | Cyno fit from data, human allometrically scaled |
| $\sigma_{leaky}$           | Leaky reflection coefficient                                                          | 0.656      | 0.656       | Fit from data                                   |
| $\sigma_{tight}$           | Tight reflection coefficient                                                          | 0.985      | 0.985       | Fit from data                                   |
| $\sigma_{lymph}$           | Lymph reflection coefficient                                                          | 0.2        | 0.2         | Ref. (2)                                        |
| $L$ (L/h)                  | Lymph flow rate                                                                       | 0.012      | 0.121       | Cynomolgus monkey fit from data, human from (2) |
| $K_p$                      | Partition coefficient                                                                 | 0.8        | 0.8         | Ref. (2)                                        |
| ISF (mL/kg)                | Interstitial fluid                                                                    | 0.579      | 15.6        | Cynomolgus monkey fit from data, human from (3) |
| $f_{leaky}$                | Fraction of leaky flow from blood to leaky                                            | 0.65       | 0.65        | Ref. (2)                                        |
| $f_{tight}$                | Fraction of lymph flow from blood to tight                                            | 0.35       | 0.35        | Ref. (2)                                        |
| $C_{R,0}$ (nM)             | Initial concentration of FLT3 receptors in circulation                                | 11.3       | 4           | Fit from data                                   |
| $vm_{prolif}$ ( $h^{-1}$ ) | Maximum rate of FLT3 expansion induced by double-bound FLT3 receptor-drug complex     | 1.90E-03   | 3.30E-3     | Fit from data                                   |
| $km_{prolif}$              | Amount of double-bound FLT3 receptor-drug complex to achieve 50% $vm_{prolif}$        | 0.547      | 0.02        | Fit from data                                   |
| $\alpha$                   | Hill coefficient of FLT3 expansion induced by double-bound FLT3 receptor-drug complex | 3.93       | 1           | Fit from data                                   |
| $k_{deg}$ ( $h^{-1}$ )     | Turnover rate of FLT3 receptors in circulation                                        | 0.016      | 0.016       | Fit from data                                   |
| $kon1$ (1/nM/h)            | On-rate for monovalent binding of drug to FLT3 receptors                              | 0.1        | 0.1         | Assumption                                      |
| $KD1$ (nM)                 | monovalent binding affinity of drug to FLT3 receptors                                 | 9          | 9           | Ref. (4)                                        |
| $kon2$ (1/nM/h)            | On-rate for binding of single-bound drug-FLT3 complex to the second FLT3 receptor     | 3.6        | 3.6         | in-house Biacore measurement                    |
| $KD2$ (nM)                 | Binding affinity of single-bound drug-FLT3 complex to the second FLT3 receptor        | 0.2        | 0.2         | in-house Biacore measurement                    |
| $kabs_{CDX}$ ( $h^{-1}$ )  | Absorption rate of CDX-301 from SC to plasma                                          | NA         | 0.04        | Fit from CDX-301 data (5)                       |

|                           |                                                                             |    |          |                              |
|---------------------------|-----------------------------------------------------------------------------|----|----------|------------------------------|
| $V_{dCDX}$ (mL/kg)        | Volume of distribution of CDX-301                                           | NA | 213      | Fit from CDX-301 data (5)    |
| $vm_{CDX}$ (mL/h/kg)      | Maximum nonlinear elimination rate of CDX-301                               | NA | 3.72     | Fit from CDX-301 data (5)    |
| $km_{CDX}$ ( $\mu$ g/mL)  | Concentration of CDX-301 needed to achieve 50% of $Vm_{CDX}$                | NA | 0.394    | Fit from CDX-301 data (5)    |
| $init_{DC1}$ (cells/mL)   | Mean initial cDC1 count                                                     | NA | 1180     | Human estimated from (5)     |
| $kdeg_{DC1}$ ( $h^{-1}$ ) | Turnover rate of the cDC1 population                                        | NA | 1.60E-02 | Fit from CDX-301 data (5, 6) |
| $vm1_{DC1}$ ( $h^{-1}$ )  | Maximum rate of cDC1 expansion induced by free drug                         | NA | 1.61     | Fit from CDX-301 data (5, 6) |
| $km1_{DC1}$ (nM)          | Concentration of free drug to increase cDC1 counts to 50% $Vm1_{DC1}$       | NA | 0.072    | Fit from CDX-301 data (5, 6) |
| $del_{DC1}$ ( $h^{-1}$ )  | Transit rate between cDC1 compartments                                      | NA | 0.114    | Fit from CDX-301 data (5, 6) |
| $n1_{DC1}$                | Hill coefficient of free drug effect on cDC1 expansion                      | NA | 5.85     | Fit from CDX-301 data (5, 6) |
| $init_{DC2}$ (cells/mL)   | Mean initial cDC2 count                                                     | NA | 12700    | Human estimated from (6)     |
| $kdeg_{DC2}$ ( $h^{-1}$ ) | Turnover rate of the cDC2 population                                        | NA | 1.70E-03 | Fit from CDX-301 data (5, 6) |
| $vm1_{DC2}$ ( $h^{-1}$ )  | Maximum rate of cDC2 expansion induced by free drug                         | NA | 16.1     | Fit from CDX-301 data (5, 6) |
| $km1_{DC2}$ (nM)          | Concentration of free drug to increase cDC2 counts to 50% $Vm1_{DC2}$       | NA | 0.209    | Fit from CDX-301 data (5, 6) |
| $del_{DC2}$ ( $h^{-1}$ )  | Transit rate between cDC2 compartments                                      | NA | 0.053    | Fit from CDX-301 data (5, 6) |
| $n1_{DC2}$                | Hill coefficient of free drug effect on cDC2 expansion                      | NA | 0.888    | Fit from CDX-301 data (5, 6) |
| $kdeg2_{DC}$ ( $h^{-1}$ ) | Second-order apoptosis rate of cDC2                                         | NA | 3.64E-04 | Fit from CDX-301 data (5, 6) |
| $f_{DC1}$                 | Fractional rate of cDC1 second-order apoptosis rate compared to that of DC2 | NA | 0.476    | Fit from CDX-301 data (5, 6) |

## References

1. Satyamitra, M.; Cary, L.; Dunn, D.; Holmes-Hampton, G.P.; Thomas, L.J.; Ghosh, S.P.; CDX-301: a novel medical countermeasure for hematopoietic acute radiation syndrome in mice. *Sci Rep.* **2020**, *10*, 1757. <https://doi.org/10.1038/s41598-020-58186-1>.
2. Cao, Y.; Balthasar, J.P.; Jusko, W.J. Second-generation minimal physiologically-based pharmacokinetic model for monoclonal antibodies. *J. Pharmacokinet. Pharmacodyn.* **2013**, *40*, 597–607. <https://doi.org/10.1007/s10928-013-9332-2>.
3. Cao, Y.; Jusko, W.J. Incorporating target-mediated drug disposition in a minimal physiologically-based pharmacokinetic model for monoclonal antibodies. *J. Pharmacokinet. Pharmacodyn.* **2014**, *41*, 375–387. <https://doi.org/10.1007/s10928-014-9372-2>.
4. Verstraete, K.; Vandriessche, G.; Januar, M.; Elegheert, J.; Shkumatov, A.V.; Desfosses, A.; Craenenbroeck, K.V.; Svergun, D.I.; Gutsche, I.; Vergauwen, B.; et al. Structural insights into the extracellular assembly of the hematopoietic Flt3 signaling complex. *Blood.* **2011**, *118*, 60–68. <https://doi.org/10.1182/blood-2011-01-329532>.
5. Anandasabapathy, N.; Breton, G.; Hurley, A.; Caskey, M.; Trumpfheller, C.; Sarma, P.; Pring, J.; Pack, M.; Buckley, N.; Matei, I.; et al. Efficacy and safety of CDX-301, recombinant human Flt3L, at expanding dendritic cells and

- hematopoietic stem cells in healthy human volunteers. *Bone Marrow Transpl.* **2015**, *50*, 924–930. <https://doi.org/10.1038/bmt.2015.74>.
6. Maraskovsky, E.; Daro, E.; Roux, E.; Teepe, M.; Maliszewski, C.R.; Hoek, J.; Caron, D.; Lebsack, M.E.; McKenna, H.J. In vivo generation of human dendritic cell subsets by Flt3 ligand. *Blood* **2000**, *96*, 878–884.
