# Supplementary material for: A Minimal PBPK/PD Model with Expansion-Enhanced Target-Mediated Drug Disposition to Support a First-in-Human Clinical Study Design for a FLT3L-Fc Molecule
Source: MDPI journal article supplement (doi:10.3390/pharmaceutics16050660), 2024-05-15
Supplement: s1 [file s1]

## ***Supplemental Instructions of gQSPsim File***

### ***Requirements:***

Session folder contains the following files:

- SimBiology® project file: Model\_FLT3L\_FC\_manuscript.sbproj
- gQSPSim project file: gQSPSIM\_FLT3L\_FC\_manuscript.sbproj
- Dataset files: DataCynoPK\_FLT3L\_FC\_manuscript.xlsx

### ***Instructions for session file set-up:***

- Open the gQSPSim App
- Click on File > Open
- Click on gQSPSim project file: gQSPSIM\_FLT3L\_FC\_manuscript.sbproj
- For Root Directory, click on the Folder symbol and select the folder that contains the model and data files named 'FLT3L\_FC\_manuscript'
- 'Objective Functions Directory', 'User-defined Functions Directory', and 'Autosave Directory' default to the same location as that of the root directory
- Select 'Autosave options' as suited and click 'OK'

### ***Instructions for Running Simulation:***

- Running a Simulation
  - Left click on plus side next to 'Simulations' in the left panel
  - Left click on plus side next to 'Simulations' for a dropdown list of figure simulations
  - Left click on desired figure simulation (ex: Fig2a\_cyno\_FLT3LFc\_PK)
  - Click the 'Play' icon  to run the simulation
  - After the simulation runs successfully, click the 'Graph' icon  to visualize the simulation
  - To edit other plot properties, click the plot settings button 

### ***gQSP Simulations:***

- "Fig2A\_cyno\_FLT3LFc\_PK" and "Fig2B\_cyno\_FLT3LFc\_PK" will simulate model fits for plasma FLT3L-Fc concentrations in cynomolgus monkey.
- "Fig3\_cyno\_FLT3LFc\_RO" will simulate projected target expression and receptor occupancy for cynomolgus monkey following exposure to FLT3L-Fc.

- “Fig4A-B\_human\_CDX\_PK-DC” and “Fig4C-D\_human\_CDX\_DCtotal” will simulate plasma drug concentrations, DC1, and total DC counts in healthy human volunteers following treatment with FLT3L.
- “Fig5\_human\_FLT3LFC\_PK” will simulate plasma drug concentrations in healthy human volunteers following treatment with FLT3L-Fc using target concentration estimated from cynomologus monkey or healthy volunteers.
- “Fig6A-C\_human\_FLT3LFC\_cynolike” and “Fig6D-F\_human\_FLT3LFC\_humanlike” will simulate projected plasma drug concentrations, activated cDC1, and total DC cells in patients treated with different dosing regimens of FLT3L-Fc using target concentration estimated from cynomologus monkey or healthy volunteers.
- “FigS1A-C\_human\_FLT3LFC\_cynolike” and “FigS1D-F\_human\_FLT3LFC\_humanlike” will simulate projected time profiles of receptor occupancy in patients treated with different dosing regimens of FLT3L-Fc using target concentration estimated from cynomologus monkey or healthy volunteers.
- “FigS2A-C\_human\_FLT3LFC\_cynolike” and “FigS2D-F\_human\_FLT3LFC\_humanlike” will simulate projected time profiles of plasma drug concentrations, activated DC1, and total DC cells in patients treated with different single dose regimens of FLT3L-Fc.
